# Supplementary material
Source: PubMed Central journal article supplement (PMC2063487)

GFP-Bem3p

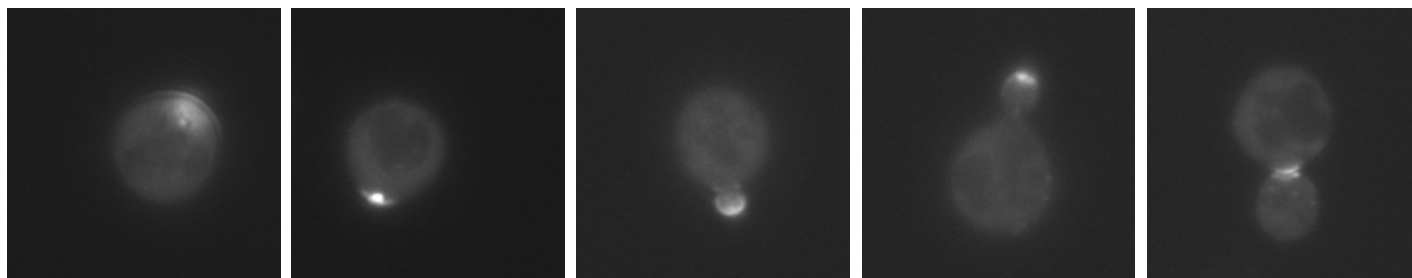

phase

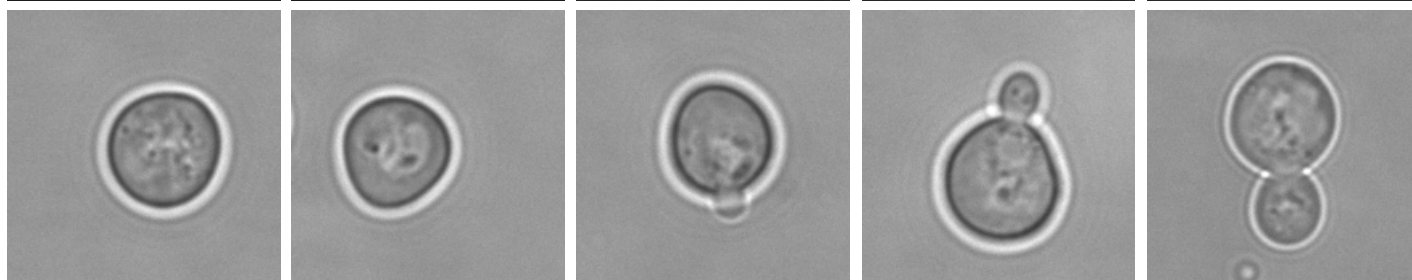

Supplement: 7601873s1.pdf [file 7601873s1.pdf]
